# Supplementary material for: A Fusion Protein between Streptavidin and the Endogenous TLR4 Ligand EDA Targets Biotinylated Antigens to Dendritic Cells and Induces T Cell ResponsesIn Vivo
Source: Hindawi journal article supplement (doi:10.1155/2013/864720), 2013-01-01

**A****EDAvidin****EDA****B****Streptavidin****MWM**

Biot

RB

Biot

RB

Biot

RB

225 KDa

76 KDa

52 KDa

38 KDa

31 KDa

24 KDa

17 KDa

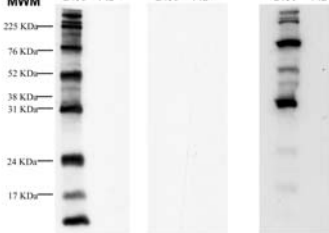

Supplement: f1 [file 864720.f1.pdf]
